# Supplementary material for: Signaling Mechanism for Modulation by GLP-1 and Exendin-4 of GABA Receptors on Rat Retinal Ganglion Cells
Source: PubMed Central journal article supplement (PMC9206055; doi:10.1007/s12264-022-00826-9), 2022-03-12
Supplement: 12264_2022_826_MOESM1_ESM.pdf [file 12264_2022_826_MOESM1_ESM.pdf]

## Supplementary Figure

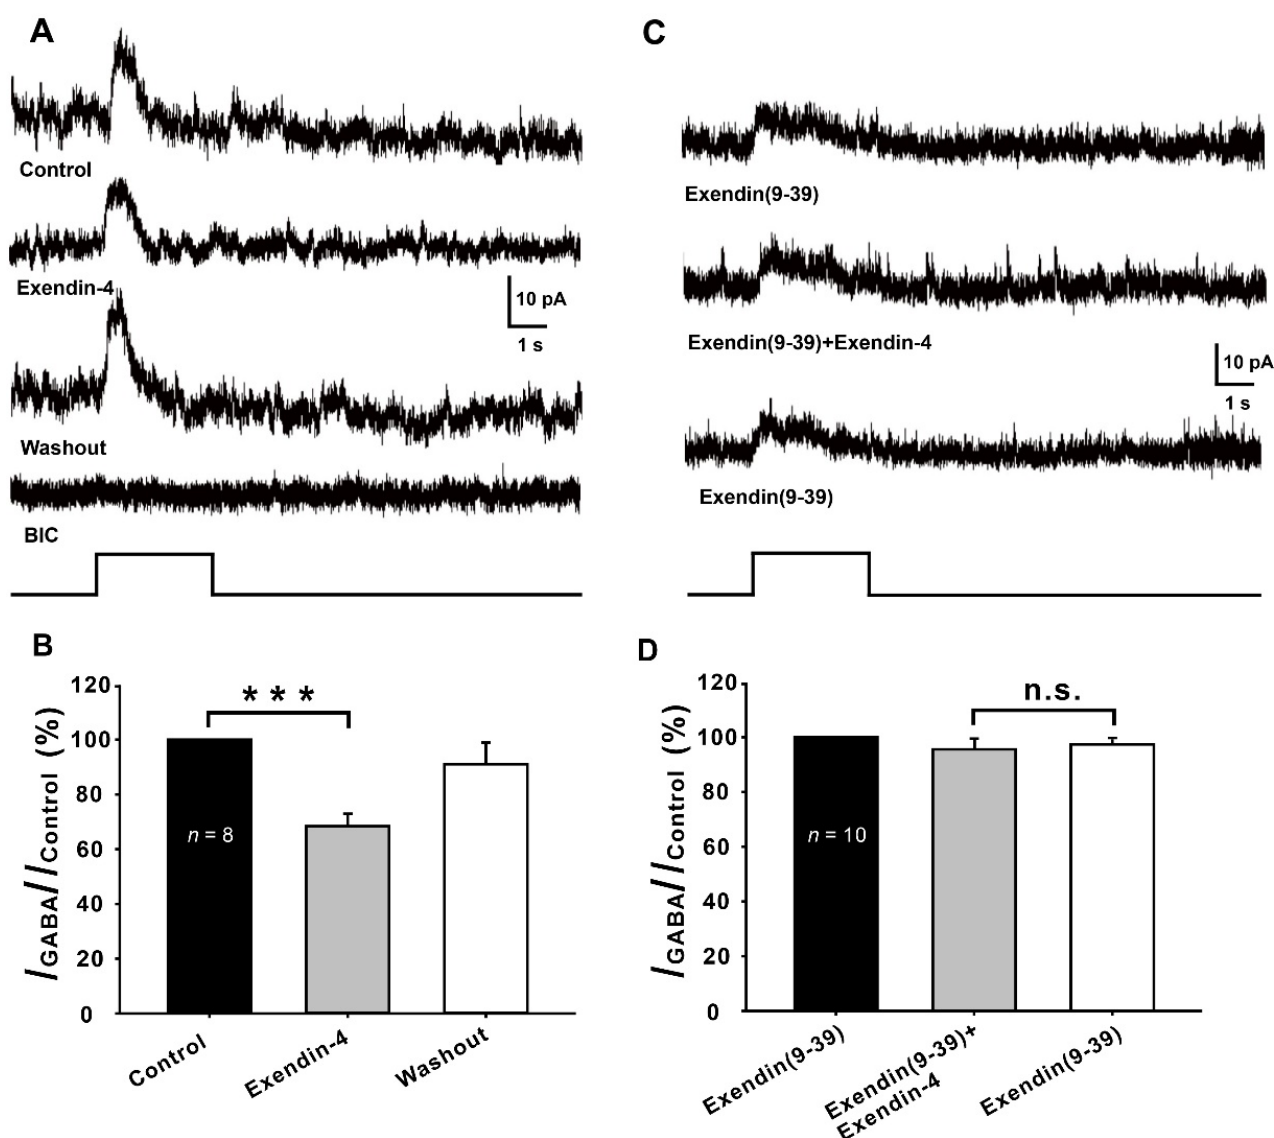

**Fig. S1** Exendin-4 suppresses GABAR-mediated L-IPSCs of GCs *via* GLP-1R activation. **A** L-IPSCs from a GC, clamped at 0 mV, elicited by a 3-s, full-field light stimulus in the presence of 1  $\mu$ mol/L TTX and 1  $\mu$ mol/L strychnine. Application of 100 nmol/L exendin-4 reversibly suppresses the L-IPSC. The L-IPSC is completely eliminated by 10  $\mu$ mol/L BIC. **B** Bar chart summarizing the changes of peak amplitudes of GABAR-mediated L-IPSCs induced by exendin-4. \*\*\* $P < 0.001$ , n.s.,  $P > 0.05$ , one-way ANOVA with *post hoc* Tukey's test. **C** GABAR-mediated L-IPSCs from a GC, showing that in the presence of 100  $\mu$ mol/L exendin(9-39), application of 100 nmol/L exendin-4 no longer suppresses the current. **D** Bar chart summarizing the changes of peak amplitudes of L-IPSCs induced by exendin(9-39) and co-application of exendin-4. Cell numbers ( $n$ ) are marked inside the bars, and the cell numbers in different bars in the same subgraph are the same.
